# Supplementary material for: Assessment of circulating proteins in thyroid cancer: Proteome-wide Mendelian randomization and colocalization analysis
Source: PubMed Central journal article supplement — iScience. 2024 May 20;27(6):109961. doi: 10.1016/j.isci.2024.109961 (PMC11214373; doi:10.1016/j.isci.2024.109961), 2024-05-20
Supplement: mmc1.pdf [file mmc1.pdf]

**Supplemental information**

**Assessment of circulating proteins in thyroid**

**cancer: Proteome-wide Mendelian**

**randomization and colocalization analysis**

**Qinghua Fan, Shifeng Wen, Yi Zhang, Xiuming Feng, Wanting Zheng, Xiaolin Liang, Yutong Lin, Shimei Zhao, Kaisheng Xie, Hancheng Jiang, Haifeng Tang, Xiangtai Zeng, You Guo, Fei Wang, and Xiaobo Yang**

**# SUPPLEMENTAL INFORMATION**

**Table S1:** Detailed colocalization analysis results, related to STAR methods

**Table S2:** Genome-wide association meta-analysis of TCs with lambda values, linkage disequilibrium regression scores and genetic contribution details for each cohort, related to STAR methods

**Figure S1:** Common protein details across five cohorts, related to STAR methods

**Figure S2:** Correlation between different protein cohorts, related to STAR methods

**Figure S3:** Variability among different protein cohorts, related to STAR methods

**Figure S4:** Gene enrichment analysis. A: GO enrichment analysis; B: KEGG enrichment analysis, related to STAR methods

**Figure S5:** PPI protein interaction network, related to STAR methods

**Figure S6:** Circular Manhattan plot of thyroid cancer whole-genome association Meta-Analysis, related to STAR methods

Table S1: Detailed colocalization analysis results, related to Figure 1

| Proteins | Nsnps | PP.H0.abf | PP.H1.abf | PP.H2.abf | PP.H3.abf | PP.H4.abf |
|----------|-------|-----------|-----------|-----------|-----------|-----------|
| ADAM23   | 2125  | 7.80E-299 | 1.69E-299 | 0.81      | 0.18      | 0.01      |
| BMP1     | 2394  | 1.46E-11  | 2.36E-12  | 0.4       | 0.06      | 0.53      |
| COL15A1  | 1239  | 1.07E-122 | 1.20E-123 | 0.75      | 0.08      | 0.16      |
| COL18A1  | 2968  | 3.72E-95  | 7.93E-96  | 0.77      | 0.16      | 0.06      |
| EIF2B1   | 2268  | 1.45E-08  | 3.17E-09  | 0.65      | 0.14      | 0.21      |
| FAM20B   | 2008  | 3.28E-20  | 4.14E-21  | 0.85      | 0.11      | 0.05      |
| GSTA1    | 2686  | 1.23E-303 | 3.64E-304 | 0.56      | 0.16      | 0.28      |
| GUSB     | 1327  | 1.61E-62  | 3.49E-63  | 0.68      | 0.15      | 0.17      |
| HINT1    | 2009  | 1.64E-18  | 3.28E-19  | 0.72      | 0.14      | 0.14      |
| IL5RA    | 1722  | 1.23E-295 | 1.49E-296 | 0.86      | 0.1       | 0.04      |
| INHBA    | 2461  | 5.98E-19  | 1.10E-19  | 0.76      | 0.14      | 0.1       |
| KYNU     | 2092  | 1.37E-250 | 2.24E-251 | 0.67      | 0.11      | 0.22      |
| LGMN     | 1394  | 3.34E-197 | 3.56E-198 | 0.22      | 0.02      | 0.76      |
| LHB      | 2728  | 4.14E-298 | 1.25E-298 | 0.68      | 0.2       | 0.12      |
| MSR1     | 1600  | 2.89E-188 | 4.63E-189 | 0.71      | 0.11      | 0.18      |
| MTHFD1   | 2112  | 2.24E-32  | 3.51E-33  | 0.82      | 0.13      | 0.05      |
| NANS     | 2296  | 3.85E-93  | 1.49E-48  | 2.58E-45  | 1         | 0         |
| NPTX1    | 2650  | 2.82E-291 | 9.22E-291 | 0.06      | 0.21      | 0.73      |
| OMD      | 1211  | 4.85E-13  | 3.82E-14  | 0.83      | 0.07      | 0.1       |
| PDCD6IP  | 1997  | 2.79E-30  | 7.68E-31  | 0.72      | 0.2       | 0.08      |
| PLEKHA7  | 2091  | 3.42E-251 | 1.85E-251 | 0.19      | 0.1       | 0.71      |
| SEMA4A   | 1674  | 3.81E-75  | 8.40E-76  | 0.7       | 0.15      | 0.14      |
| SPOCK2   | 2174  | 1.28E-110 | 1.87E-111 | 0.81      | 0.12      | 0.07      |
| TNFAIP3  | 2394  | 2.91E-49  | 8.80E-50  | 0.3       | 0.09      | 0.61      |
| VCAM1    | 1016  | 9.99E-26  | 1.96E-26  | 0.15      | 0.03      | 0.82      |
| VPS26A   | 2521  | 1.18E-78  | 2.18E-79  | 0.78      | 0.14      | 0.07      |

Table S2: Genome-wide association meta-analysis of TCs with lambda values, linkage disequilibrium regression scores and genetic contribution details for each cohort, related to STAR Methods

| Cohort                 | Mean chisq | Lambda | Ldsc  | se (Ldsc) | Ratio | se (Ratio) | h <sup>2</sup> | se (h <sup>2</sup> ) | Z (h <sup>2</sup> ) | pval (h <sup>2</sup> ) |
|------------------------|------------|--------|-------|-----------|-------|------------|----------------|----------------------|---------------------|------------------------|
| Aleksandra et al.,GWAS | 1.268      | 1.198  | 1.248 | 0.01      | 0.926 | 0.039      | 0.897          | 0.53                 | 1.691               | 0.091                  |
| UKBB                   | 1.024      | 1.023  | 1.017 | 0.007     | 0.698 | 0.307      | 0.072          | 0.103                | 0.699               | 0.485                  |
| FinnGen R9             | 1.079      | 1.057  | 1.019 | 0.01      | 0.236 | 0.124      | 0.009          | 0.003                | 3.361               | 1.00E-03               |
| Meta GWAS              | 1.109      | 1.075  | 1.035 | 0.009     | 0.325 | 0.085      | 0.011          | 0.003                | 4.124               | 3.72E-05               |

Notes: Mean chisq:the average of the Chi-square values of each SNP, Lambda:Genetic structure bias in GWAS, Ldsc:Estimates of genetic correlation, se: standard error, Ratio: The proportion of the contribution of genetic variation to complex traits relative to the underlying risk (confounding factor), h<sup>2</sup>: genetic contribution, Z: Genetic correlation Z score =h<sup>2</sup> observed/h<sup>2</sup> observed se, pval: The P-value of genetic correlation

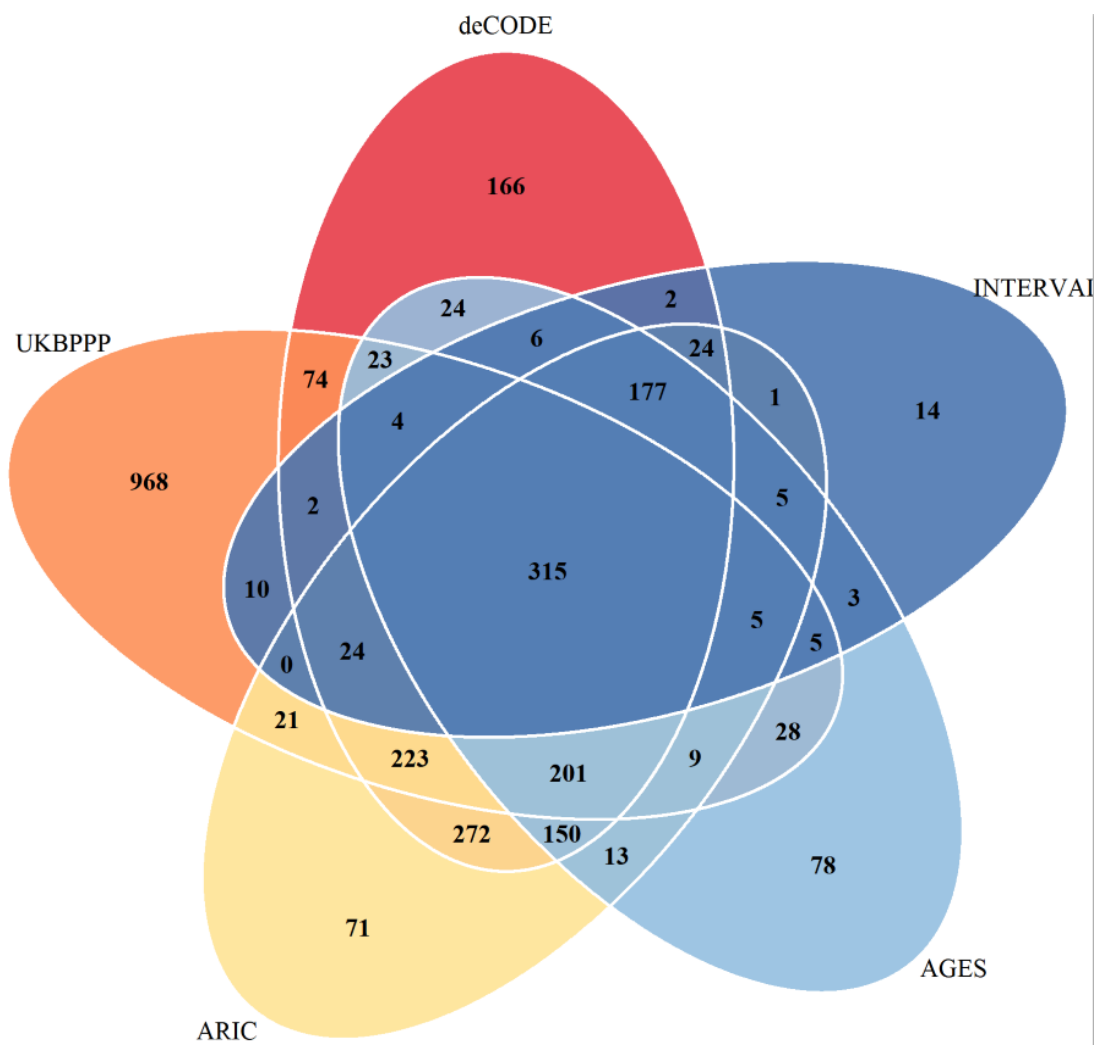

**Figure S1:** Common Protein Details Across Five Cohorts, related to STAR Methods

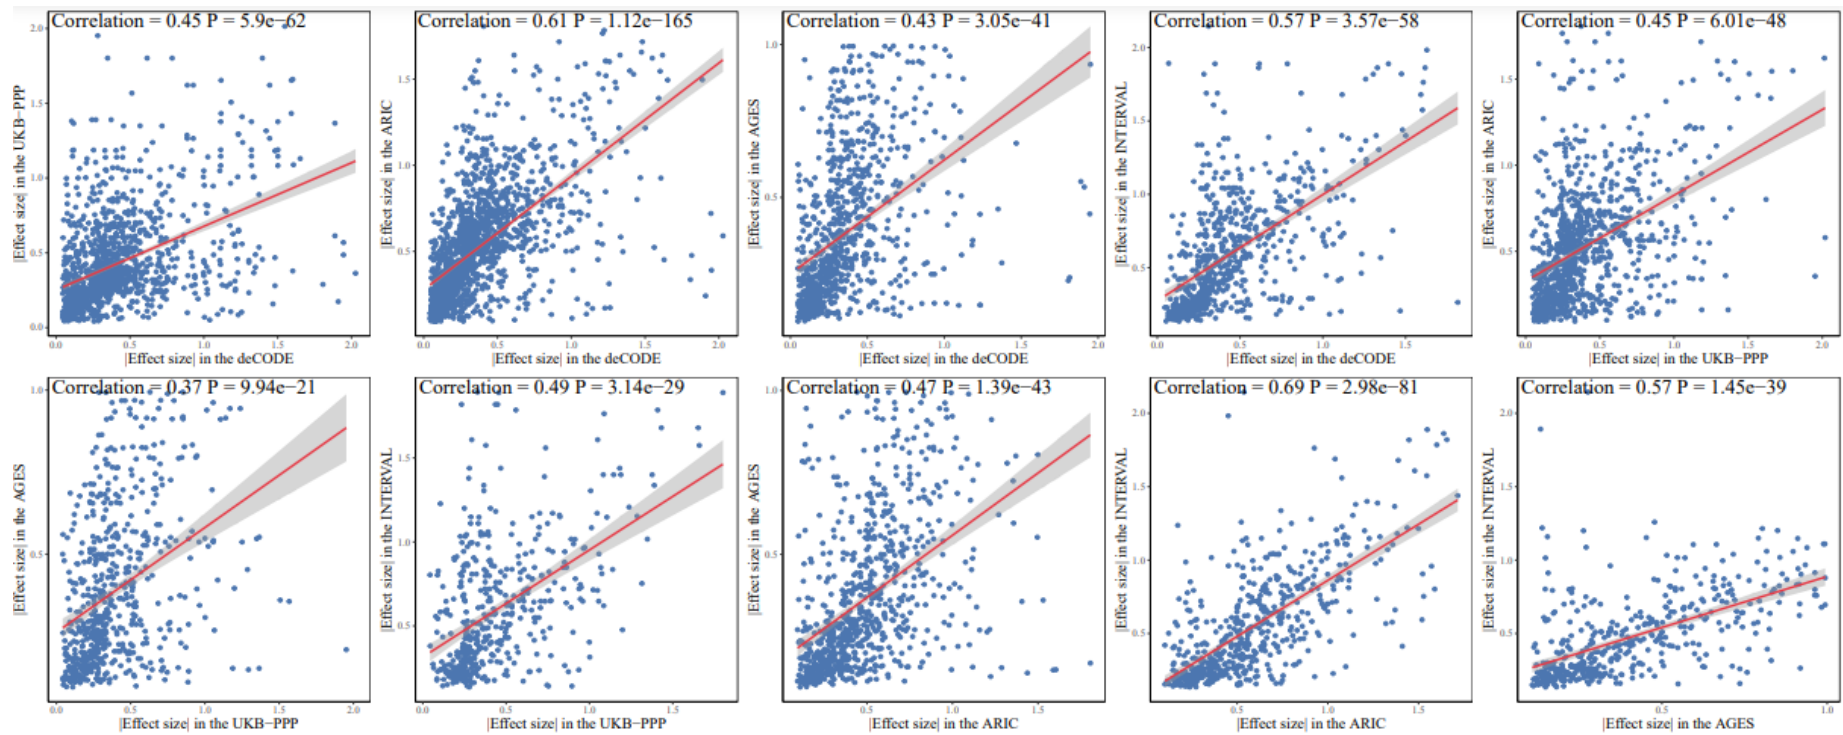

**Figure S2:** Correlation Between Different Protein Cohorts, related to result

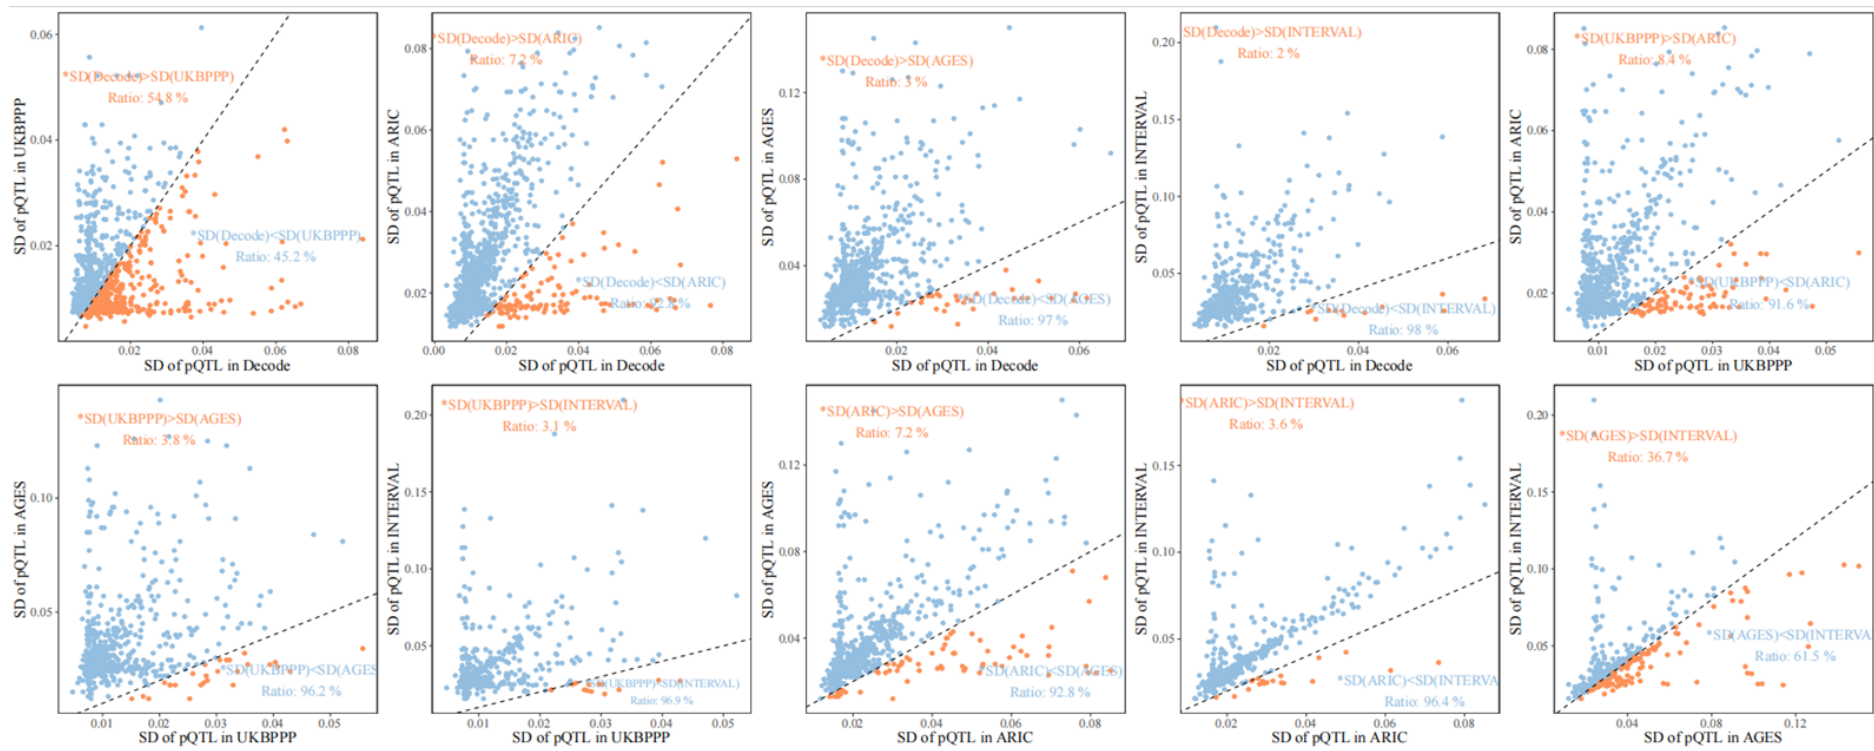

**Figure S3:** Variability Among Different Protein Cohorts, related to result



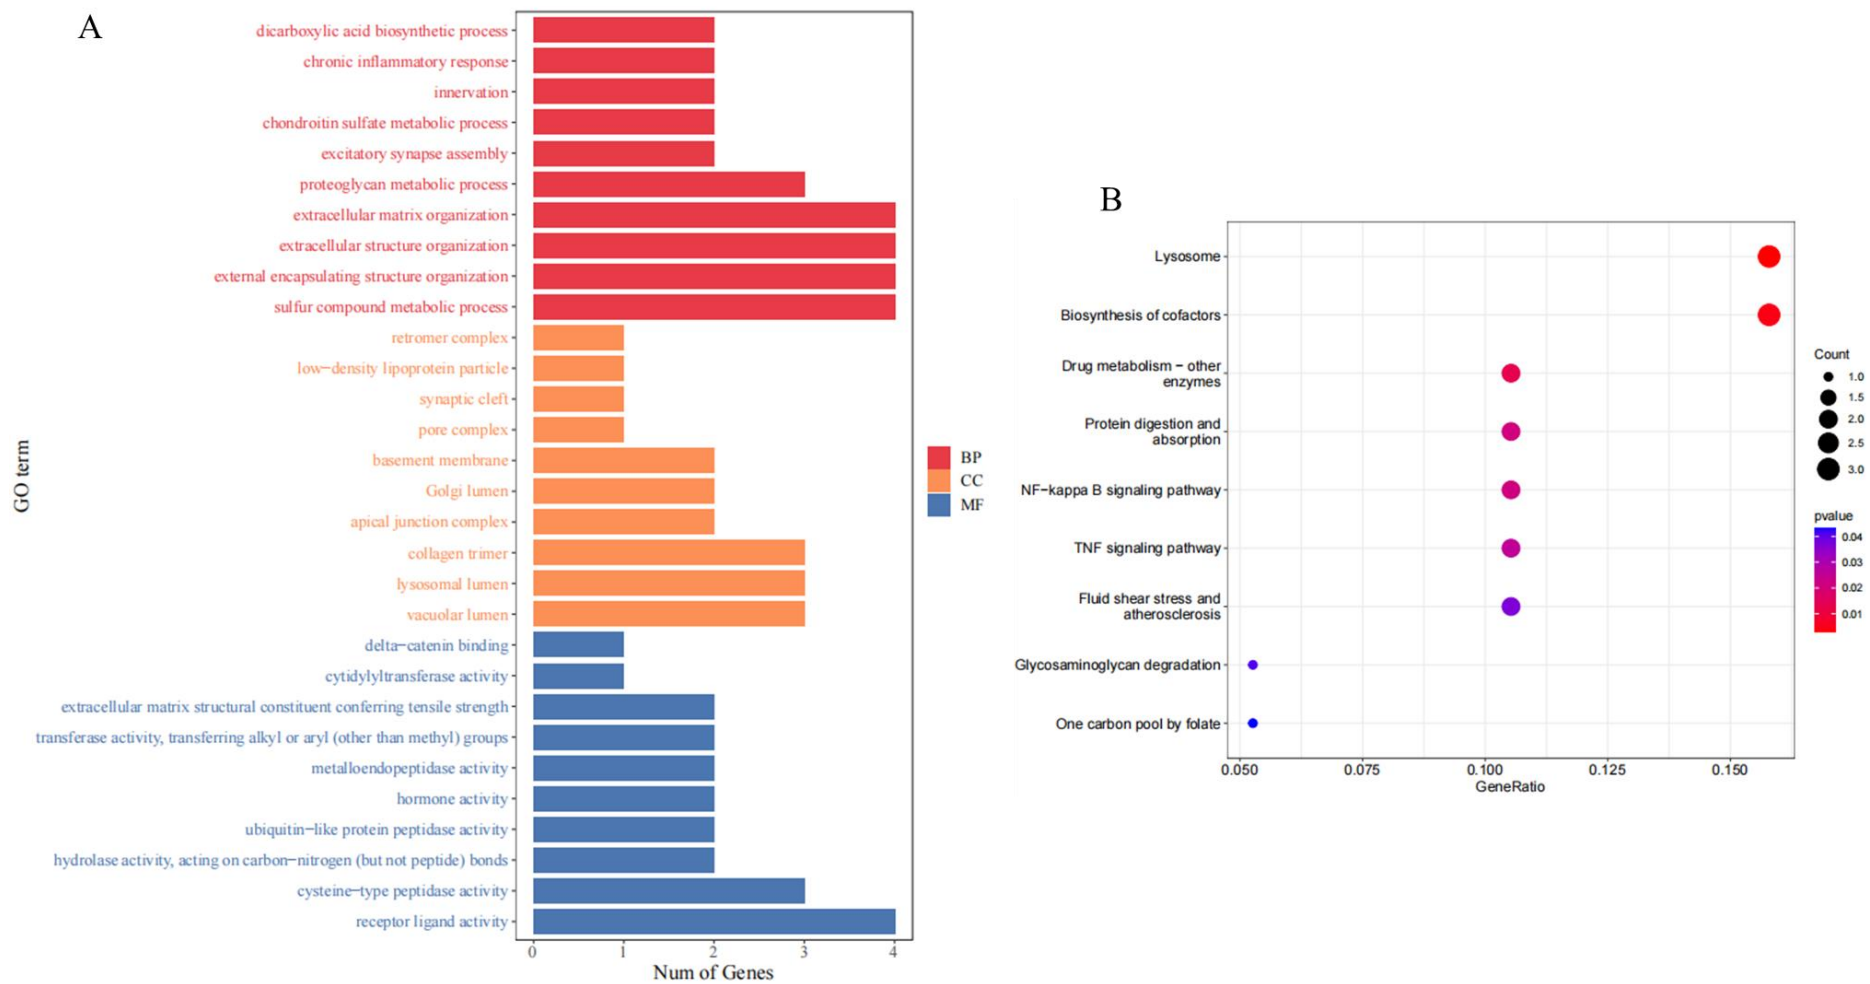

**Figure S4:** Gene Enrichment Analysis. A: GO Enrichment Analysis; B: KEGG Enrichment Analysis, related to result

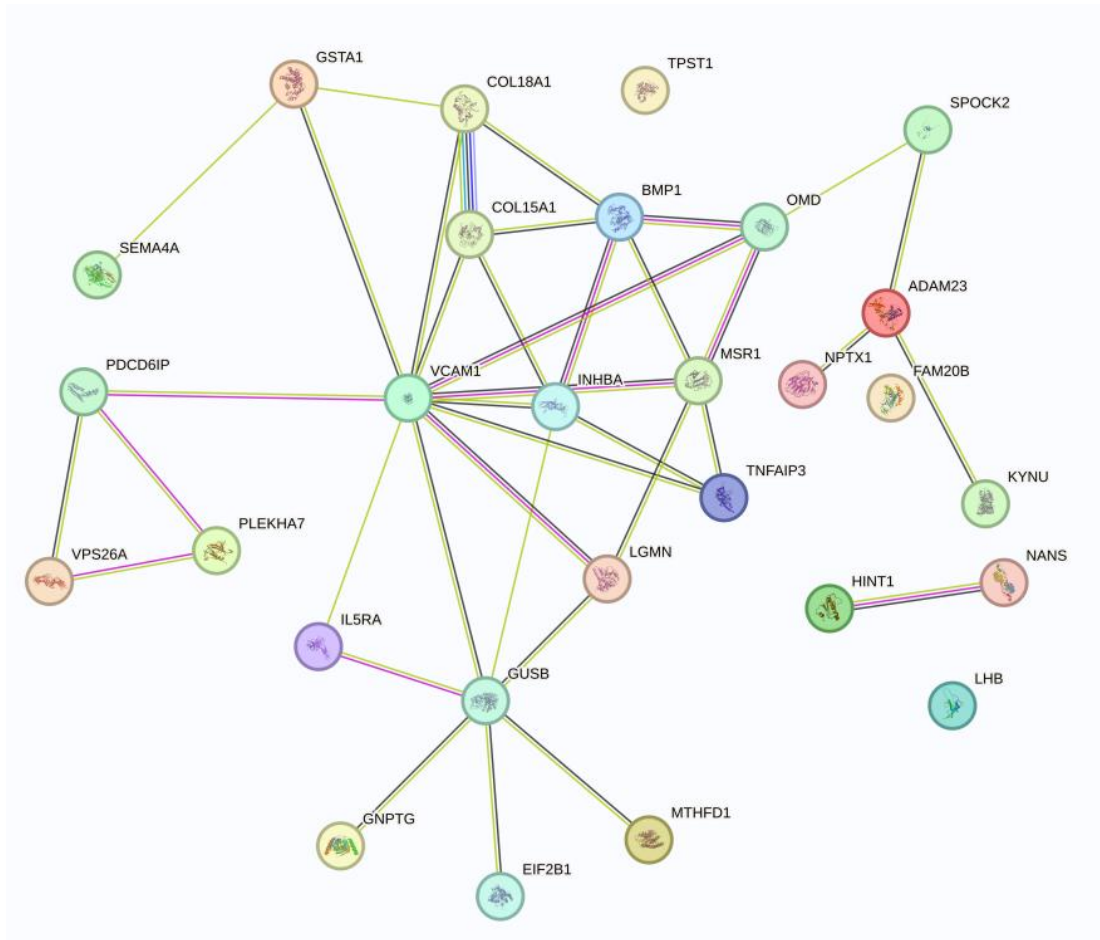

**Figure S5:** PPI Protein Interaction Network, related to result

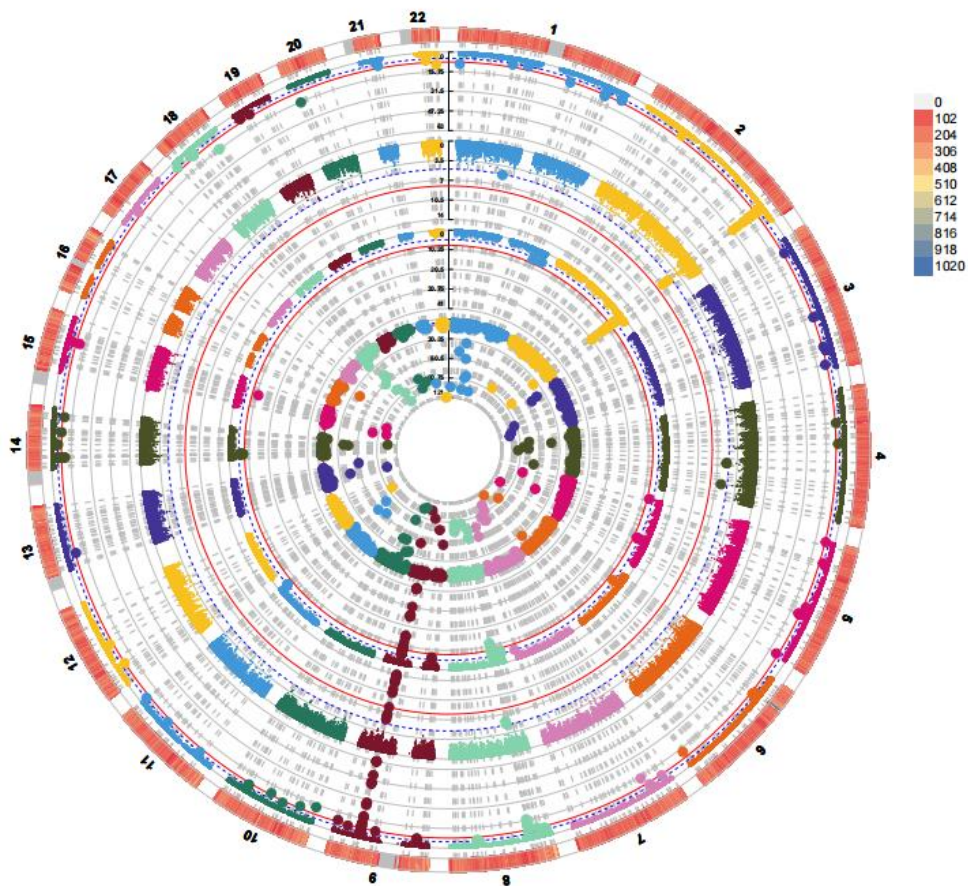

**Figure S6:** Circular Manhattan Plot of Thyroid Tumor Whole-Genome Association Meta-Analysis, related to STAR Method
